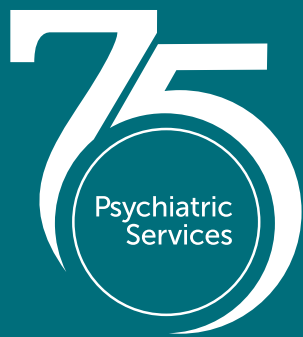

# Psychiatric Services

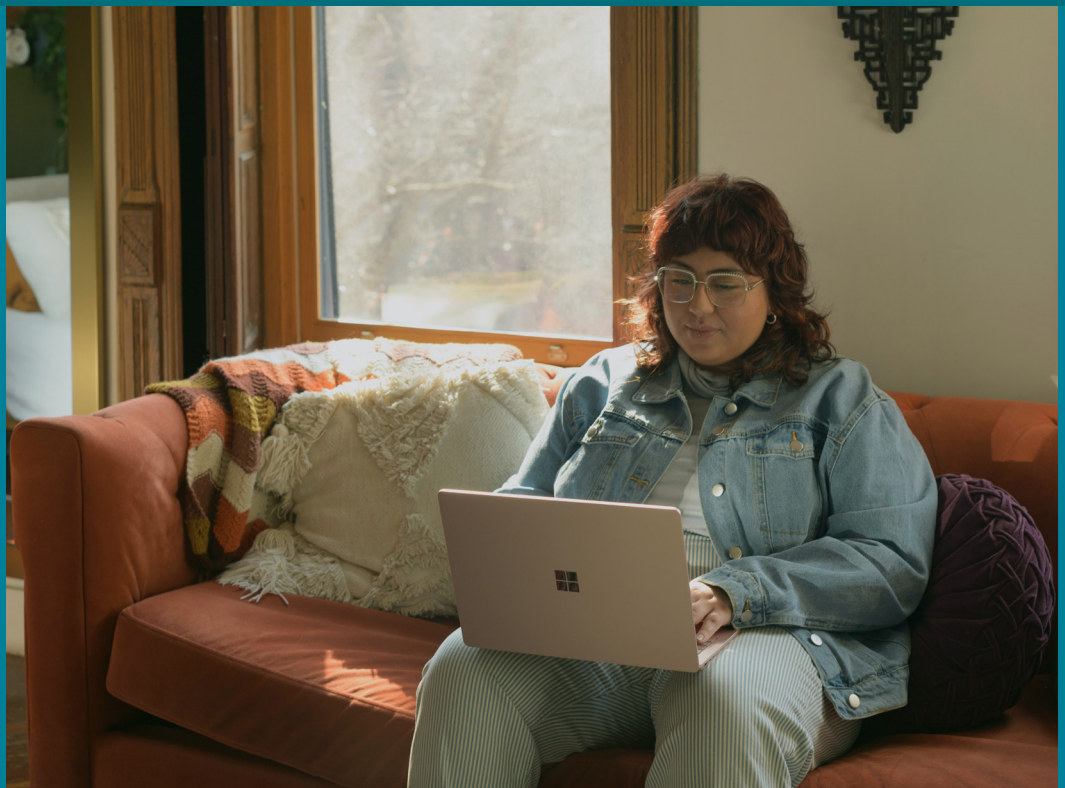

Psychotherapy disruption before and after the transition to virtual mental health care

Racial disparities in diagnosis of postpartum mood and anxiety disorders

Trends in telepsychiatry and in-person psychiatric care for depression

Open Forum: Support from intermediary organizations for evidence-based practices in behavioral health care
